# Supplementary material for: Efficient electroreduction of CO2to syngas over ZIF-8 derived oxygen vacancy-rich ZnO nanomaterials
Source: Royal Society of Chemistry journal article supplement (doi:10.1039/d2nj05378k), 2023-01-01
Supplement: d2nj05378k1.pdf [file d2nj05378k1.pdf]

Electronic Supplementary Information

**Efficient electroreduction of CO<sub>2</sub> to syngas over ZIF-8 derived  
oxygen vacancy-rich ZnO nanomaterials**

Jie Yang,<sup>a</sup> Hui Wang,<sup>a</sup> Han Yang,<sup>a</sup> Weiwei Dong,<sup>\*b</sup> Mingqi Gao,<sup>c</sup> Guangying Zhou,<sup>a</sup>  
Haiying Tian,<sup>c</sup> Renjie Zhang,<sup>a</sup> Jiqiang Wan,<sup>\*c</sup> and Dexin Yang<sup>\*a</sup>

<sup>a</sup>*Green Catalysis Center, College of Chemistry, Zhengzhou University, Zhengzhou, Henan 450001,  
China.*

<sup>b</sup>*Beijing Synchrotron Radiation Facility, Institute of High Energy Physics, Chinese Academy of  
Sciences, Beijing, 100049, China.*

<sup>c</sup>*Technology Center, China Tobacco Henan Industry Co., Ltd, 450000, Zhengzhou, Henan, China*

\*E-mail: yangdx@zzu.edu.cn; dongww@ihep.ac.cn; wanjiqiang1114@163.com

## Experimental Section

### Chemicals

Zinc nitrate hexahydrate ( $\text{Zn}(\text{NO}_3)_2 \cdot 6\text{H}_2\text{O}$ ), 2-methylimidazole, ethanol, and acetonitrile were purchased from Kermel Chemical Reagent Co., Ltd. Acetone was obtained from Sinopharm Chemical Reagent Co., Ltd., P. R. China. Polyethylene oxide-polypropylene oxide-polyethylene (PEO-PPO-PEO, P123) was purchased from Beijing Innochem Technology Co., Ltd. Toray Carbon Paper (TGP-H-60,  $19 \times 19$  cm), tetrabutylammonium bromide (TBAB), Nafion D-521 dispersion (5% w/w in water and 1-propanol), and Nafion N-117 membrane (0.180 mm thick,  $\geq 0.90$  meg/g exchange capacity) were purchased from Alfa Aesar China Co., Ltd.  $\text{CO}_2$  (99.999%) and  $\text{N}_2$  (99.99%) were obtained from Henan Yumeng Technology Co., Ltd. 1-Butyl-3-methylimidazolium hexafluorophosphate ( $[\text{Bmim}]\text{PF}_6$ ) was supplied by the Centre of Green Chemistry and Catalysis, Lanzhou Institute of Chemical Physics, Chinese Academy of Sciences.

### Characterization

The microstructures of ZnO-d and ZnO-n were analyzed by scanning electron microscopy (Care Zeiss SIGMA 500) and transmission electron microscopy (JEOL JEM-2100F) equipped with energy dispersive X-ray spectrometer (EDS). The crystal structures of different ZIF-8 and ZnO were measured by X-ray diffractometer (X'Pert PRO) with the  $\text{Cu-K}\alpha$  radiation ( $\lambda = 0.15406$  nm), the scanning speed was  $5^\circ \text{min}^{-1}$ . The valence states of the elements on ZnO-d and ZnO-n surfaces were investigated by X-ray photoelectron spectroscopy (XPS, Thermo Scientific ESCALab 250Xi) using 200 W  $\text{Al-K}\alpha$  source. The base pressure in the analysis chamber was  $3 \times 10^{-10}$  mbar. And the electron binding energies of samples were corrected using the C 1s line at 284.8 eV from adventitious carbon.

### Catalysts preparation

**Synthesis of ZIF-8 with different morphologies:** According to literature reported,<sup>1</sup> 1.05 g of  $\text{Zn}(\text{NO}_3)_2 \cdot 6\text{H}_2\text{O}$ , 1.16 g of 2-methylimidazole, and 3.01 g of TBAB were added to a 100 mL round bottom flask, and the mixture was heated at  $60^\circ \text{C}$ . After 1 h

stirring, a colorless and transparent solution was obtained. An appropriate amount of H<sub>2</sub>O was added into the round bottom flask, and then the transparent solution became turbid. The obtained mixture was separated by centrifugation and the precipitate was washed alternately with H<sub>2</sub>O and ethanol for three times. Finally, the product was dried at 60 °C in a vacuum drying oven for 12 h to obtain ZIF-8 nanostructures with dodecahedral morphology (ZIF-8-d). The synthesis procedure of ZIF-8 nanoparticles (ZIF-8-n) is the same with that of ZIF-8-d, except that 3.01 g of TBAB was replaced by 0.1 g of P123.

**Synthesis of ZnO-d and ZnO-n nanomaterials:** The above-mentioned two ZIF-8 nanostructures with different morphologies were ground and annealed at 600 °C for 2 h under air condition. When the temperature naturally cooled down to room temperature, the different ZnO were obtained. The ZnO-d and ZnO-n were derived from ZIF-8-d and ZIF-8-n, respectively.

**Electrode preparation:** 50 mg of ZnO-d or ZnO-n and 1 mg of carbon black (Vulcan XC 72) were added to a mixed solution of 3 mL of acetone and 30 μL of Nafion D-521 (5 wt%), and the mixture were ultrasonicated for 30 min. After a homogeneous suspension was formed, 0.3 mL of the above suspension was dropped onto a carbon paper substrate (1 × 1 cm<sup>2</sup>) and dried at room temperature. The loading mass of ZnO-n or ZnO-d nanomaterials on carbon paper is about 5 mg cm<sup>-2</sup>.

**Electrochemical experiment:** The electrochemical experiments were all carried out on the CHI 6081E electrochemical workstation. The LSV scans and electrolysis experiments were performed in a typical H-type cell with a three-electrode system, in which the above-mentioned electrode was used as working electrode, platinum gauze (Pt) was employed as the counter electrode, and Ag/Ag<sup>+</sup> (0.01 M AgNO<sub>3</sub> and 0.1 M TBAP in acetonitrile) was used as the reference electrode. In the experiment, a proton exchange membrane (Nafion-117) was used to separate the cathode compartment filled with electrolyte of [Bmim]PF<sub>6</sub> (30 wt%)/acetonitrile/H<sub>2</sub>O (5 wt%) and anode compartment filled with electrolyte of H<sub>2</sub>SO<sub>4</sub> solution (0.5 M). In each experiment, the amount of electrolyte was 25 mL. Before the electrolysis experiment, the catholyte was

purged by CO<sub>2</sub> for about 30 min to form a CO<sub>2</sub>-saturated electrolyte. During the electrolysis process, slight magnetic stirring was used under a steady stream of CO<sub>2</sub> (20 sccm) to obtain uniform electrolytes. LSV curves were tested in CO<sub>2</sub>- or N<sub>2</sub>-saturated [Bmim]PF<sub>6</sub> (30 wt%)/acetonitrile/H<sub>2</sub>O (5 wt%) electrolytes over a potential range of -1.0 V to -2.5 V vs. Ag/Ag<sup>+</sup> with a scan rate of 20 mV s<sup>-1</sup>.

**Product analysis:** During the electrolysis reaction, gaseous products were analyzed using a gas chromatograph (Agilent 8860) equipped with a thermal conductivity detector (TCD) and a flame ionization detector (FID). In addition, the liquid products were detected using <sup>1</sup>H NMR spectrometer (Bruker Avance III 600 HD) in DMSO-d<sub>6</sub>. Then, the FE of different products was calculated according to the corresponding amount of gaseous and liquid products.<sup>2</sup>

**EIS measurement:** EIS was measured under an open circuit potential condition in [Bmim]PF<sub>6</sub> (30 wt%)/acetonitrile/H<sub>2</sub>O (5 wt%) ternary electrolyte with an amplitude of 5 mV and the frequency of 10<sup>-2</sup>~10<sup>5</sup> Hz.

**C<sub>dl</sub> measurement:** The ECSA value is proportional to the value of C<sub>dl</sub>.<sup>3,4</sup> The value of C<sub>dl</sub> was determined by measuring the capacitive current related to double-layer charging from the scan-rate dependence of cyclic voltammogram (CV). The CV scans were measured with various scan rates over a potential range of -1.6 to -1.7 V vs. Ag/Ag<sup>+</sup> in a H-type cell. The value of C<sub>dl</sub> was estimated by plotting the peak current density (*j*) at -1.65 V vs. Ag/Ag<sup>+</sup> against the square root of scan rates.

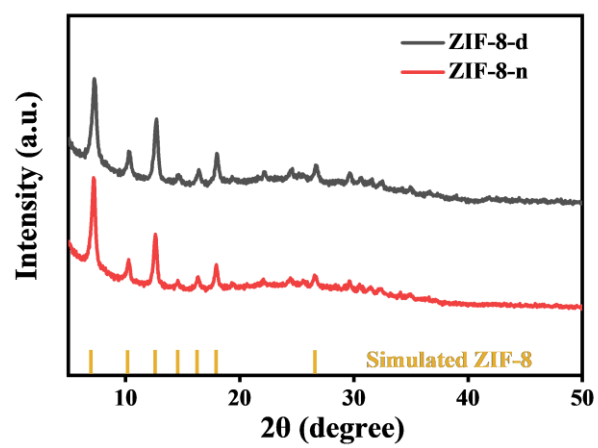

Fig. S1. XRD patterns of ZIF-8-d and ZIF-8-n.

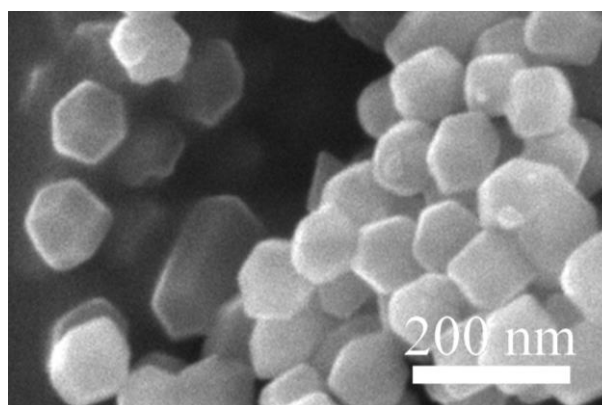

Fig. S2. SEM image of ZIF-8-d.

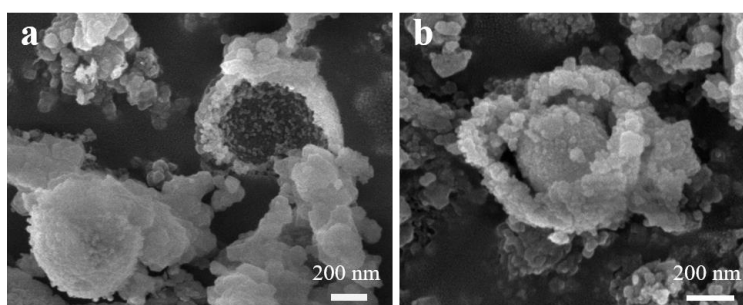

Fig. S3. SEM image of ZIF-8-n.

In Figs. S3a and b, some hollow spheres, spheres, and dispersive nanoparticles are observed in ZIF-8-n, and the homogeneity of ZIF-8-n is poor. Meanwhile, it can observe that these hollow spheres and spheres are made up of many nanoparticles, so we think that the ZIF-8-n is mainly composed of many irregular nanoparticles.

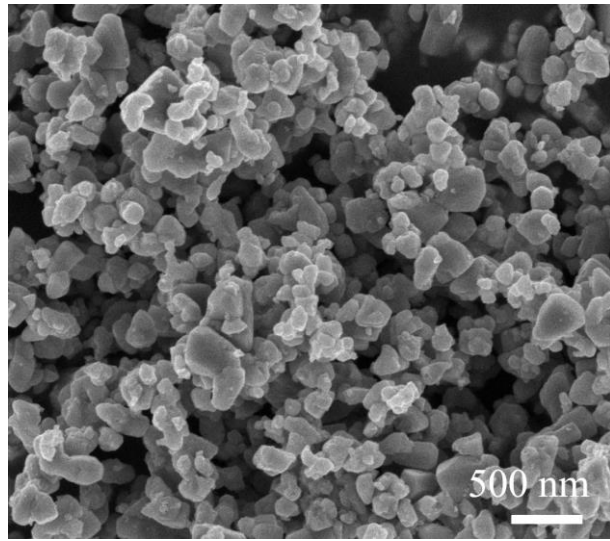

Fig. S4. SEM image of ZnO-d.



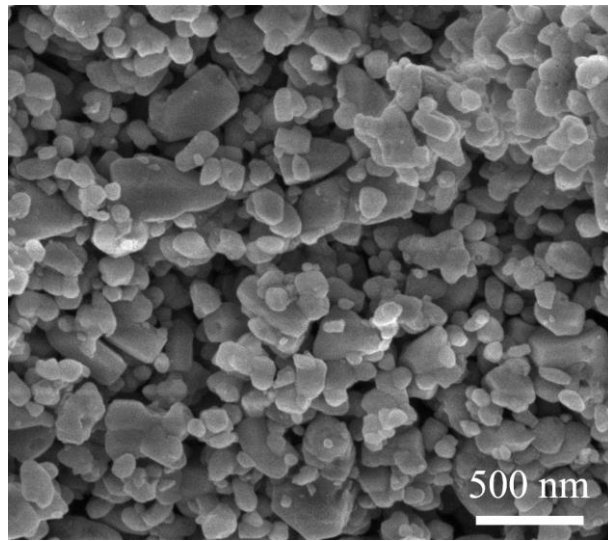

Fig. S5. SEM image of ZnO-n.

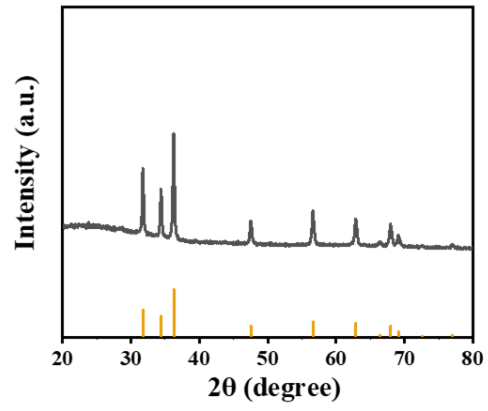

Fig. S6. XRD pattern of ZnO-1.

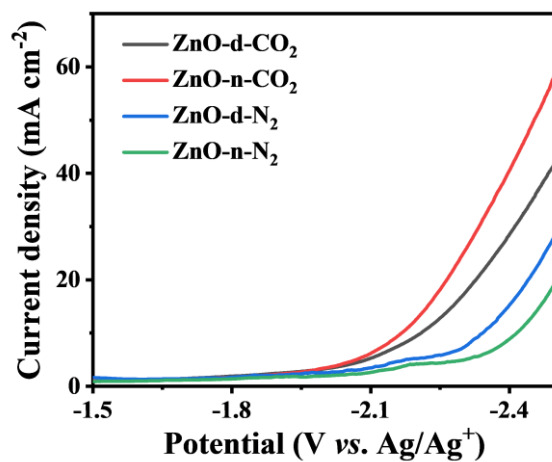

Fig. S7. LSV curves on ZnO-n and ZnO-d in the CO<sub>2</sub>- or N<sub>2</sub>-saturated [Bmim]PF<sub>6</sub> (30 wt%)/acetonitrile/H<sub>2</sub>O (5 wt%) ternary electrolyte.

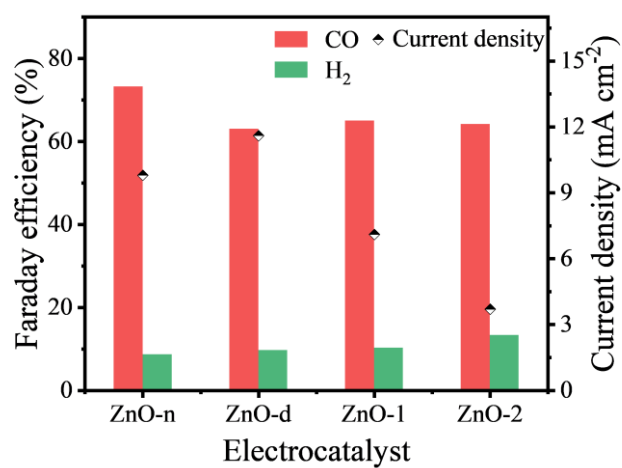

Fig. S8 The current density, maximum CO FE, and H<sub>2</sub> FE over ZnO-n (at -1.9 V vs. Ag/Ag<sup>+</sup>), ZnO-d (at -2.1 V vs. Ag/Ag<sup>+</sup>), ZnO-1 (at -1.9 V vs. Ag/Ag<sup>+</sup>), and ZnO-2 (at -1.9 V vs. Ag/Ag<sup>+</sup>).

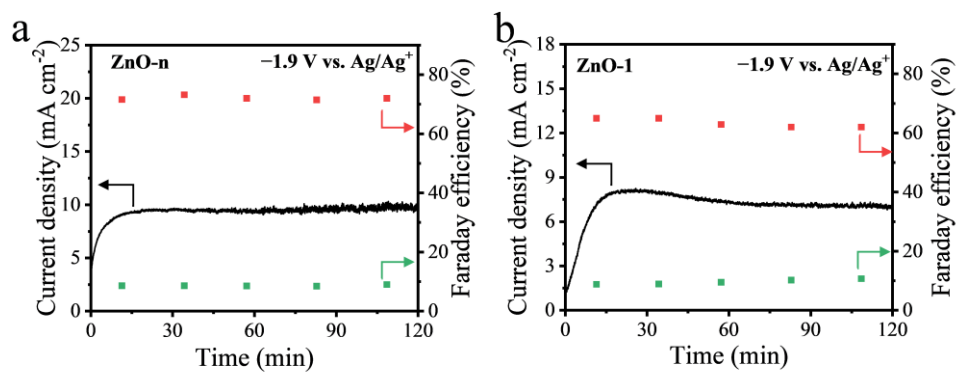

Fig. S9 The i-t curves and FE of CO and H<sub>2</sub> over ZnO-n (a) and ZnO-1 (b).

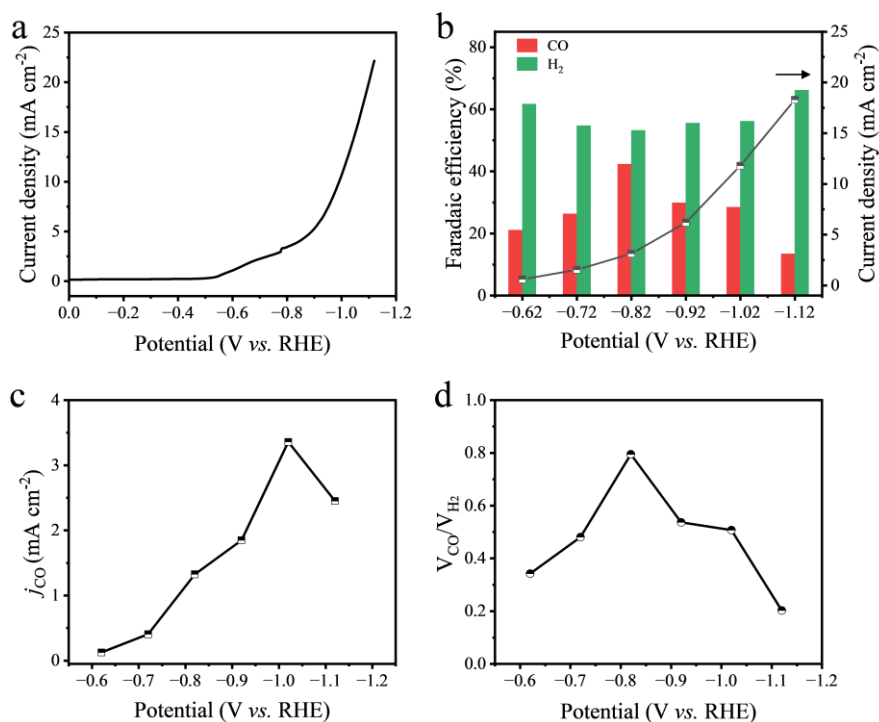

Fig. S10 (a) LSV curve on ZnO-n in the CO<sub>2</sub>-saturated 0.5 M KHCO<sub>3</sub> electrolyte; (b) FEs of CO, H<sub>2</sub> and current density on ZnO-n at different applied potentials; (c) CO partial current density at different applied potentials for ZnO-n; (d) The volume ratios between CO and H<sub>2</sub> at the applied potentials.

Table S1 Summary of the catalytic performance of Zn-based electrocatalysts for CO<sub>2</sub>-to-syngas conversion.

| Catalyst                                  | Electrolyte                                                                 | Potential<br>/V vs. RHE              | CO: H <sub>2</sub> ratio | FE <sub>CO</sub> | Refs         |
|-------------------------------------------|-----------------------------------------------------------------------------|--------------------------------------|--------------------------|------------------|--------------|
| Defective ZnO                             | 0.5 M KOH                                                                   | -0.6 ~ -1.1 V vs. RHE                | ~1:7~2:1                 | 50%              | [5]          |
| Zn/Cu foam                                | 0.5 M KHCO <sub>3</sub>                                                     | -0.6 ~ -1.3 V vs. RHE                | ~1:5~2.3:1               | 40%              | [6]          |
| ZnO                                       | 0.1 M KHCO <sub>3</sub>                                                     | -0.7 ~ -1.6 V vs. RHE                | ~1:3.6~2.1:1             | ~70%             | [7]          |
| CuZnO/CNT                                 | 0.1 M KHCO <sub>3</sub>                                                     | -0.4 ~ -1.2 V vs. RHE                | ~1:6.3~1:1               | 50%              | [8]          |
| Zn-Cu alloyed                             | 0.1 M CsHCO <sub>3</sub>                                                    | -0.8 ~ -1.2 V vs. RHE                | ~1:3.7~5:1               | 27%              | [9]          |
| Zn/Ni                                     | 0.1 M KCl                                                                   | -0.8 ~ -2.4 V vs. RHE                | ~1.22:1                  | 55%              | [10]         |
| Zn <sub>x</sub> Cd <sub>1-x</sub> S-Amine | 0.5 M NaHCO <sub>3</sub>                                                    | -0.76 ~ -1.16 V vs. RHE              | ~0~19.7:1                | ~80%             | [11]         |
| CuZnAl-Oxide                              | 0.1 M KHCO <sub>3</sub>                                                     | -0.89 ~ -1.89 V vs. RHE              | ~1:2~1:5                 | 25%              | [12]         |
| oxide-derived Zn                          | 0.5 M KHCO <sub>3</sub>                                                     | -0.7 ~ -1.1 V vs. RHE                | ~1:3.3~1.1:1             | 55%              | [13]         |
| ZnCu                                      | 0.5 M KHCO <sub>3</sub>                                                     | -1.0 ~ -1.8 V vs. RHE                | ~1:4~0.74:1              | 47.2%            | [14]         |
| defective ZnO doped<br>carbon             | 0.5 M KHCO <sub>3</sub>                                                     | -0.8 ~ -1.3 V vs. RHE                | ~1:1.5~2.7:1             | 71%              | [15]         |
| Zn film                                   | 0.5 M KHCO <sub>3</sub>                                                     | -0.67 ~ -1.27 V vs. RHE              | ~1:11.1~11.4:1           | 92.6%            | [16]         |
| Zn/ZnO <sub>NR</sub>                      | 0.1 M NaHCO <sub>3</sub>                                                    | -0.58 ~ -1.38 V vs. RHE              | ~1:4.5~4:1               | 62.7%            | [17]         |
| ZnO-d, ZnO-n                              | [Bmim]PF <sub>6</sub> (30<br>wt%)/acetonitrile<br>/H <sub>2</sub> O (5 wt%) | -1.7 ~ -2.2 V vs. Ag/Ag <sup>+</sup> | ~1:3~8.5:1               | 73.2%            | This<br>Work |

Table S2 The effect of [Bmim]PF<sub>6</sub> concentration in the electrolyte for CO<sub>2</sub> electroreduction on ZnO-n at -1.9 V vs. Ag/Ag<sup>+</sup>.

| [Bmim]PF <sub>6</sub> concentration (wt%) | Current density         | FE <sub>CO</sub> | FE <sub>H<sub>2</sub></sub> | V <sub>CO</sub> /V <sub>H<sub>2</sub></sub> |
|-------------------------------------------|-------------------------|------------------|-----------------------------|---------------------------------------------|
| 20                                        | 3.7 mA cm <sup>-2</sup> | 39.4%            | 44.8%                       | 0.88                                        |
| 30                                        | 9.8 mA cm <sup>-2</sup> | 73.2%            | 8.6%                        | 8.5                                         |
| 40                                        | 2.4 mA cm <sup>-2</sup> | 50.5%            | 34.8%                       | 1.5                                         |



## References

1. Y. Pan, D. Heryadi, F. Zhou, L. Zhao, G. Lestari, H. Su and Z. Lai, *CrystEngComm*, 2011, **13**, 6937.
2. C. Chen, X. Sun, X. Yan, Y. Wu, H. Liu, Q. Zhu, B. B. A. Bediako and B. Han, *Angew. Chem. Int. Ed.*, 2020, **59**, 11123-11129.
3. S. Gao, Y. Lin, X. Jiao, Y. Sun, Q. Luo, W. Zhang, D. Li, J. Yang and Y. Xie, *Nature*, 2016, **529**, 68-71.
4. X. Kang, L. Li, A. Sheveleva, X. Han, J. Li, L. Liu, F. Tuna, E. J. L. McInnes, B. Han, S. Yang and M. Schroder, *Nat. Commun.*, 2020, **11**, 5464.
5. R. Daiyan, E. C. Lovell, B. Huang, M. Zubair, J. Leverett, Q. Zhang, S. Lim, J. Horlyck, J. Tang, X. Lu, K. Kalantar-Zadeh, J. N. Hart, N. M. Bedford and R. Amal, *Adv. Energy Mater.*, 2020, **10**, 2001381.
6. B. Qin, Y. Li, H. Fu, H. Wang, S. Chen, Z. Liu and F. Peng, *ACS Appl. Mater. Interfaces*, 2018, **10**, 20530-20539.
7. B. Qin, Q. Zhang, Y. H. Li, G. Yang and F. Peng, *ACS Appl. Mater. Interfaces*, 2020, **12**, 30466-30473.
8. I. Hjorth, M. Nord, M. Rønning, J. Yang and D. Chen, *Catal. Today*, 2020, **357**, 311-321.
9. S. Lamaison, D. Wakerley, D. Montero, G. Rousse, D. Taverna, D. Giaume, D. Mercier, J. Blanchard, H. N. Tran, M. Fontecave and V. Mougél, *ChemSusChem*, 2019, **12**, 511-517.
10. M. Beheshti, S. Kakoei, M. C. Ismail and S. Shahrestani, *Electrochim. Acta*, 2020, **341**, 135976.
11. N. Meng, C. Liu, Y. Liu, Y. Yu and B. Zhang, *Angew. Chem. Int. Ed.*, 2019, **58**, 18908-18912.
12. H. Guzman, D. Roldan, A. Sacco, M. Castellino, M. Fontana, N. Russo and S. Hernandez, *Nanomaterials (Basel)*, 2021, **11**, 3052.
13. K. Han, P. Ngene and P. de Jongh, *ChemCatChem*, 2021, **13**, 1998-2004.
14. K. Malik, B. M. Rajbongshi and A. Verma, *J. CO<sub>2</sub> Util.*, 2019, **33**, 311-319.
15. C. Ma, X. Zou, A. Li, Z. Gao, L. Luo, S. Shen, J. Zhang, Z. Huang and L. Zhu, *Electrochim. Acta*, 2022, **411**, 140098.
16. P. Li, J. Liu, J. Bi, Q. Zhu, T. Wu, J. Ma, F. Zhang, J. Jia and B. Han, *Green Chem.*, 2022, **24**, 1439-1444.
17. J. Young Maeng, J. Hyun Yang, H. Ji Jang, M. Hee Joo, Y. Jun Kim, C. Kyun Rhee and Y. Sohn, *Appl. Surf. Sci.*, 2023, **609**, 155349.
